# Supplementary material for: Ordering of computed tomography scans for head and cervical spine: a qualitative study exploring influences on doctors’ decision-making
Source: Springer Nature journal article supplement (doi:10.1186/s12913-022-08156-2), 2022-06-18
Supplement: MOESM2 [file 23179846]

# Evaluation of the ordering of CT scans of head and cervical spine

## Semi-structured Interview Questions

### Opening Remarks:

**“Thank you for your time.**

I would like to start off with a brief introduction of myself: My name is \_\_\_\_\_ and I am [describe role]

The purpose of this interview is to explore aspects that influence doctors’ practices and decision-making in the ordering of CT scans. This will help us in better understanding the ordering of scans and barriers and facilitators in following clinical decision tools to inform the development and implementation of sustainable strategies.

We really value your input and honest contribution. Anything you tell us will be treated with strictest confidence and your identity will be protected.

If you have any questions regarding this research please do not hesitate to contact any of the research team members.

**The interview should take about 30 minutes.**

---

### Pre-interview information to be collected:

1. Gender:  Male  Female  Other
2. Age group (years):  21-30  31-40  41-50  51-60  ≥ 61
3. Country/region of birth:  Australia  China  Malaysia  New Zealand  
 United Kingdom  Other, please specify \_\_\_\_\_
4. At which university did you obtain your initial medical qualification?  
\_\_\_\_\_
5. Which year did you graduate with your medical degree? \_\_\_\_\_
6. In which year did you first obtain your registration to practise as a doctor in Australia? \_\_\_\_\_
7. How many years have you worked as a doctor? \_\_\_\_\_
8. How long have you worked as an ED doctor? (months or years) \_\_\_\_\_
9. If you have any specialist training, please list these \_\_\_\_\_
10. When did you obtain your specialist training? \_\_\_\_\_



**4. Consider the following scenarios:**

- a. A 19-year-old was found unconscious at a party. He has normal vital signs, no sign of trauma and no clear neurological deficit. There is no witnessed drug intake, but he smells of alcohol.
  - What are your considerations for imaging his brain (head).
  - Would you proceed to ordering a scan?
  
- b. A 43-year-old driver of a car was rear-ended at 40km/h. She was wearing a seatbelt and she could extricate herself from the car and walked around on the scene. She never lost consciousness, has no neurology but now complains on midline C-spine tenderness. She declines analgesia and says the pain is 4/10.
  - What are your considerations for imaging the C-spine?
  - Would you proceed to ordering a scan?
  
  - How will your decision be impacted if she presents to the ED two days after the car accident?
  
- c. An 87-year-old nursing home patient has had an unwitnessed fall and is found on the floor. There are no clear injuries. The patient has a background of dementia and her cognitive function seems unchanged. She is on aspirin.
  - What are your considerations for imaging her brain?
  - Would you proceed to ordering a scan?
  
  - What would you do if she presents one day after the fall?
  
  - How will your decision be impacted if she represents after 7 days due to ongoing headaches?

5. Consider a recent ordering of a CT scan for the head or C-spine when you were unsure whether a scan was necessary.

What process did you go through?

5. Can you describe for me whether you have recently made any changes to your CT scan ordering decision-making processes?

Prompts:

- Something that you used to do that you no longer do, something that used to be your standard practice
- Please describe the impact of the change(s). How important do you consider the change(s) to be?
- What initiated this change?
- What did you consider when deciding to change your practice?
- What were the facilitators that you encountered during this process?
- What frustrations/barriers did you encounter during this process?
- How did you feel about making this change?

**The next few questions will focus on the ordering of CT scans in general.**

6. Can you tell me about scenarios/situations that involve particular patient groups who are referred for scans due to doctors having a suspicion of a condition but who may benefit from more rational test ordering.

Prompts:

- TIA stroke
- Minor head injury
- Headache without neurology
- Chronic abdominal pain
- Whiplash neck pain
- Kidney stone

With reference to what we have already discussed, we will now talk about aspects that might assist or facilitate decision-making processes.

7. What are your thoughts about clinical decision tools being incorporated into ieMR?

Prompts:

- How should this be implemented?
- Can you give examples?
- What about clinician pop-up fatigue?

8. What are your thoughts about the relationship between clinical decision tools and clinical judgement?

Prompts:

- What are appropriate reasons to deviate from clinical decision tools?

10. Do you have any further comments about decision-making in the ordering of CT scans that we have not covered?

**Thank you for your time.**
